# Supplementary material
Source: PubMed Central journal article supplement (PMC6125155)

Patient Name x  
 Patient ID x  
 Date x  
 Visit x  
 Doctor x  
 Hygienist x

Age: 55  
 Gender: Female  
 Diabetic: No  
 Smoker: No

# PERIODONTAL PROFILE P3 System<sup>®</sup>

## PHENOTYPE

| Buccal Surface | 1 |   | 2   |   | 3   |   | 4   |   | 5   |    | 6   |   | 7   |   | 8   |   |     |   |     |   |     |   |     |
|----------------|---|---|-----|---|-----|---|-----|---|-----|----|-----|---|-----|---|-----|---|-----|---|-----|---|-----|---|-----|
|                | d | f | m   | d | f   | m | d   | f | m   | d  | f   | m | d   | f | m   | d | f   | m |     |   |     |   |     |
| GI             |   |   |     | 0 |     | 0 |     | 0 |     | 0  |     | 0 |     | 0 |     | 0 |     | 0 |     |   |     |   |     |
| PI             |   |   | 1   |   | 1   |   | 0   |   | 0   |    | 0   |   | 0   |   | 0   |   | 0   |   | 0   |   |     |   |     |
| BOP            |   |   | 1   | 0 | 1   | 0 | 0   | 0 | 0   | 0  | 0   | 0 | 0   | 0 | 0   | 0 | 0   | 0 | 0   |   |     |   |     |
| PD             |   |   | 2   | 1 | 2   | 2 | 1   | 2 | 2   | 1  | 3   | 2 | 1   | 1 | 1   | 1 | 2   | 1 | 1   | 1 | 1   | 1 | 1   |
| CEJ            |   |   | 1   | 1 | 1   | 1 | 1   | 1 | 1   | -1 | 1   | 1 | -1  | 1 | 1   | 0 | 1   | 1 | 1   | 1 | 1   | 1 | 1   |
| AL             |   |   | 1   | 0 | 1   | 1 | 0   | 1 | 1   | 2  | 2   | 1 | 2   | 0 | 0   | 1 | 0   | 1 | 0   | 0 | 0   | 0 | 0   |
| TPC            |   |   | E   |   | A   |   | A   |   | A   |    | A   |   | A   |   | A   |   | A   |   | A   |   | A   |   | A   |
| TPC/Risk       |   |   | 4.9 |   | 4.5 |   | 4.5 |   | 4.5 |    | 4.5 |   | 4.5 |   | 4.5 |   | 4.5 |   | 4.5 |   | 4.5 |   | 4.5 |

| Buccal Surface | 9 |   | 10  |   | 11  |   | 12  |   | 13  |   | 14  |   | 15  |   | 16  |   |     |   |     |   |     |   |     |
|----------------|---|---|-----|---|-----|---|-----|---|-----|---|-----|---|-----|---|-----|---|-----|---|-----|---|-----|---|-----|
|                | m | f | d   | m | f   | d | m   | f | d   | m | f   | d | m   | f | d   | m | f   | d |     |   |     |   |     |
| GI             |   |   | 0   |   | 0   |   | 0   |   | 0   |   | 0   |   | 0   |   | 0   |   | 0   |   | 0   |   |     |   |     |
| PI             |   |   | 0   |   | 0   |   | 0   |   | 0   |   | 0   |   | 0   |   | 0   |   | 0   |   | 0   |   |     |   |     |
| BOP            |   |   | 0   | 0 | 0   | 0 | 0   | 0 | 0   | 0 | 0   | 0 | 0   | 0 | 0   | 0 | 0   | 0 | 0   | 0 | 0   | 0 | 0   |
| PD             |   |   | 1   | 1 | 1   | 1 | 1   | 1 | 1   | 2 | 2   | 1 | 2   | 2 | 1   | 2 | 2   | 2 | 2   | 2 | 2   | 2 | 2   |
| CEJ            |   |   | 1   | 1 | 1   | 1 | 1   | 1 | 1   | 1 | 1   | 1 | -1  | 1 | 1   | 0 | 1   | 1 | 1   | 1 | 1   | 1 | 1   |
| AL             |   |   | 0   | 0 | 0   | 0 | 0   | 0 | 0   | 0 | 0   | 1 | 1   | 2 | 1   | 1 | 1   | 1 | 1   | 1 | 1   | 1 | 1   |
| TPC            |   |   | A   |   | A   |   | A   |   | A   |   | A   |   | A   |   | A   |   | A   |   | A   |   | A   |   | A   |
| TPC/Risk       |   |   | 4.5 |   | 4.5 |   | 4.5 |   | 4.5 |   | 4.5 |   | 4.5 |   | 4.5 |   | 4.5 |   | 4.5 |   | 4.5 |   | 4.5 |

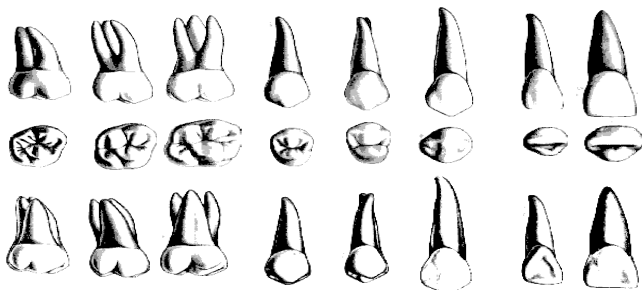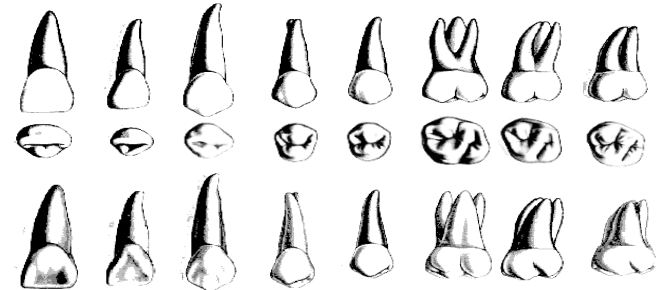

| Lingual Surface | 1 |   | 2 |   | 3 |   | 4 |   | 5 |   | 6 |   | 7 |   | 8 |   |   |   |   |   |   |   |   |   |
|-----------------|---|---|---|---|---|---|---|---|---|---|---|---|---|---|---|---|---|---|---|---|---|---|---|---|
|                 | d | l | m | d | l | m | d | l | m | d | l | m | d | l | m | d | l | m |   |   |   |   |   |   |
| GI              |   |   |   |   |   |   |   |   |   |   |   |   |   |   |   |   |   |   |   |   |   |   |   |   |
| PI              |   |   |   |   |   |   |   |   |   |   |   |   |   |   |   |   |   |   |   |   |   |   |   |   |
| BOP             |   |   | 0 | 0 | 0 | 1 | 0 | 1 | 1 | 0 | 1 | 0 | 0 | 0 | 0 | 0 | 0 | 0 | 0 | 0 | 0 | 0 | 0 | 0 |
| PD              |   |   | 4 | 2 | 3 | 3 | 1 | 3 | 2 | 1 | 2 | 2 | 1 | 1 | 1 | 1 | 1 | 1 | 1 | 1 | 1 | 1 | 2 |   |
| CEJ             |   |   | 1 | 1 | 1 | 1 | 0 | 1 | 1 | 0 | 1 | 1 | 0 | 1 | 1 | 0 | 1 | 1 | 0 | 1 | 1 | 0 | 1 |   |
| AL              |   |   | 3 | 1 | 2 | 2 | 1 | 2 | 1 | 1 | 1 | 1 | 1 | 0 | 0 | 1 | 0 | 0 | 1 | 0 | 0 | 1 | 1 |   |

| Lingual Surface | 9 |   | 10 |   | 11 |   | 12 |   | 13 |   | 14 |   | 15 |   | 16 |   |   |    |   |   |   |   |   |   |
|-----------------|---|---|----|---|----|---|----|---|----|---|----|---|----|---|----|---|---|----|---|---|---|---|---|---|
|                 | m | l | d  | m | l  | d | m  | l | d  | m | l  | d | m  | l | d  | m | l | d  |   |   |   |   |   |   |
| GI              |   |   |    |   |    |   |    |   |    |   |    |   |    |   |    |   |   |    |   |   |   |   |   |   |
| PI              |   |   |    |   |    |   |    |   |    |   |    |   |    |   |    |   |   |    |   |   |   |   |   |   |
| BOP             |   |   | 0  | 0 | 0  | 0 | 0  | 0 | 0  | 0 | 0  | 0 | 0  | 0 | 0  | 0 | 0 | 0  | 0 | 0 | 0 | 0 | 0 | 0 |
| PD              |   |   | 1  | 1 | 1  | 1 | 1  | 1 | 1  | 1 | 2  | 2 | 1  | 2 | 2  | 1 | 2 | 2  | 1 | 2 | 2 | 1 | 2 | 2 |
| CEJ             |   |   | 1  | 0 | 1  | 1 | 0  | 1 | 1  | 0 | 1  | 1 | 1  | 1 | 0  | 1 | 1 | -1 | 1 | 1 | 1 | 1 | 1 | 1 |
| AL              |   |   | 0  | 1 | 0  | 0 | 1  | 0 | 0  | 1 | 1  | 1 | 0  | 1 | 1  | 1 | 1 | 1  | 1 | 2 | 1 | 1 | 0 | 1 |

| Buccal Surface | 32 |   | 31  |   | 30  |   | 29  |   | 28  |   | 27  |   | 26  |   | 25  |   |     |   |     |   |     |   |     |
|----------------|----|---|-----|---|-----|---|-----|---|-----|---|-----|---|-----|---|-----|---|-----|---|-----|---|-----|---|-----|
|                | d  | f | m   | d | f   | m | d   | f | m   | d | f   | m | d   | f | m   | d | f   | m |     |   |     |   |     |
| GI             |    |   |     | 0 |     | 0 |     | 0 |     | 0 |     | 0 |     | 0 |     | 0 |     | 0 |     |   |     |   |     |
| PI             |    |   |     | 0 |     | 0 |     | 0 |     | 0 |     | 0 |     | 0 |     | 0 |     | 0 |     |   |     |   |     |
| BOP            |    |   | 0   | 0 | 0   | 0 | 0   | 0 | 0   | 0 | 0   | 0 | 0   | 0 | 0   | 0 | 0   | 0 | 0   | 0 | 0   | 0 | 0   |
| PD             |    |   | 2   | 2 | 2   | 2 | 1   | 2 | 1   | 1 | 1   | 1 | 1   | 1 | 1   | 1 | 1   | 1 | 1   | 1 | 1   | 1 | 1   |
| CEJ            |    |   | 1   | 1 | 1   | 1 | -1  | 1 | 1   | 0 | 1   | 1 | -2  | 1 | 1   | 0 | 1   | 1 | 0   | 1 | 1   | 0 | 1   |
| AL             |    |   | 1   | 1 | 1   | 1 | 2   | 1 | 0   | 1 | 0   | 3 | 0   | 0 | 1   | 0 | 1   | 0 | 1   | 0 | 1   | 0 | 1   |
| TPC            |    |   | A   |   | A   |   | A   |   | B   |   | A   |   | A   |   | A   |   | A   |   | A   |   | A   |   | A   |
| TPC/Risk       |    |   | 4.5 |   | 4.5 |   | 4.5 |   | 7.2 |   | 4.5 |   | 4.5 |   | 4.5 |   | 4.5 |   | 4.5 |   | 4.5 |   | 4.5 |

| Buccal Surface | 24 |   | 23  |    | 22  |   | 21  |   | 20  |   | 19  |    | 18  |   | 17  |   |     |   |     |   |     |   |     |
|----------------|----|---|-----|----|-----|---|-----|---|-----|---|-----|----|-----|---|-----|---|-----|---|-----|---|-----|---|-----|
|                | m  | f | d   | m  | f   | d | m   | f | d   | m | f   | d  | m   | f | d   | m | f   | d |     |   |     |   |     |
| GI             |    |   | 0   |    | 0   |   | 0   |   | 0   |   | 1   |    | 0   |   | 0   |   | 0   |   | 0   |   |     |   |     |
| PI             |    |   | 0   |    | 0   |   | 0   |   | 0   |   | 0   |    | 0   |   | 0   |   | 0   |   | 0   |   |     |   |     |
| BOP            |    |   | 0   | 0  | 0   | 0 | 0   | 0 | 0   | 0 | 0   | 0  | 0   | 0 | 0   | 0 | 0   | 0 | 0   | 0 | 0   | 0 | 1   |
| PD             |    |   | 1   | 1  | 1   | 1 | 1   | 1 | 1   | 1 | 1   | 1  | 1   | 1 | 2   | 2 | 1   | 2 | 2   | 2 | 2   | 3 | 3   |
| CEJ            |    |   | 1   | -1 | 1   | 1 | 1   | 1 | 0   | 1 | 1   | -1 | 1   | 0 | 1   | 1 | 0   | 1 | 1   | 1 | 1   | 1 | 1   |
| AL             |    |   | 0   | 2  | 0   | 0 | 0   | 0 | 1   | 0 | 0   | 2  | 0   | 0 | 1   | 1 | 1   | 1 | 1   | 1 | 1   | 1 | 2   |
| TPC            |    |   | A   |    | A   |   | A   |   | A   |   | A   |    | A   |   | A   |   | A   |   | A   |   | A   |   | A   |
| TPC/Risk       |    |   | 4.5 |    | 4.5 |   | 4.5 |   | 4.5 |   | 4.5 |    | 4.5 |   | 4.5 |   | 4.5 |   | 4.5 |   | 4.5 |   | 4.5 |

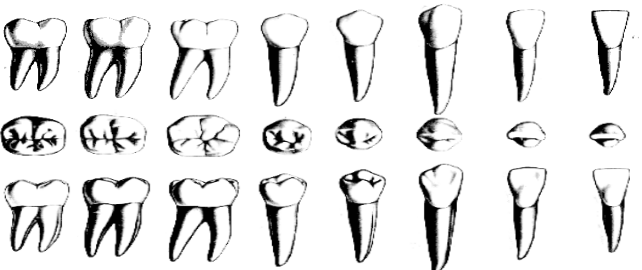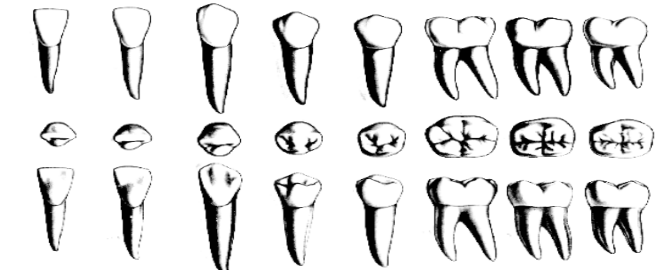

| Lingual Surface | 32 |   | 31 |   | 30 |   | 29 |   | 28 |   | 27 |   | 26 |   | 25 |   |   |   |   |   |   |   |   |  |
|-----------------|----|---|----|---|----|---|----|---|----|---|----|---|----|---|----|---|---|---|---|---|---|---|---|--|
|                 | d  | l | m  | d | l  | m | d  | l | m  | d | l  | m | d  | l | m  | d | l | m |   |   |   |   |   |  |
| GI              |    |   |    |   |    |   |    |   |    |   |    |   |    |   |    |   |   |   |   |   |   |   |   |  |
| PI              |    |   |    |   |    |   |    |   |    |   |    |   |    |   |    |   |   |   |   |   |   |   |   |  |
| BOP             |    |   | 1  | 0 | 1  | 1 | 0  | 1 | 1  | 0 | 0  | 0 | 0  | 0 | 0  | 0 | 0 | 0 | 0 | 0 | 0 | 0 | 0 |  |
| PD              |    |   | 2  | 2 | 3  | 2 | 1  | 3 | 3  | 1 | 2  | 1 | 1  | 1 | 1  | 1 | 1 | 1 | 1 | 1 | 1 | 1 | 1 |  |
| CEJ             |    |   | 1  | 1 | 1  | 1 | 1  | 1 | 1  | 0 | 1  | 1 | 1  | 1 | 1  | 0 | 1 | 1 | 1 | 1 | 1 | 1 | 1 |  |
| AL              |    |   | 1  | 1 | 2  | 1 | 0  | 2 | 2  | 1 | 1  | 0 | 0  | 0 | 0  | 1 | 0 | 0 | 1 | 0 | 0 | 1 | 0 |  |

| Lingual Surface | 24 |   | 23 |   | 22 |   | 21 |   | 20 |   | 19 |   | 18 |   | 17 |   |   |   |   |   |   |   |   |   |
|-----------------|----|---|----|---|----|---|----|---|----|---|----|---|----|---|----|---|---|---|---|---|---|---|---|---|
|                 | m  | l | d  | m | l  | d | m  | l | d  | m | l  | d | m  | l | d  | m | l | d |   |   |   |   |   |   |
| GI              |    |   |    |   |    |   |    |   |    |   |    |   |    |   |    |   |   |   |   |   |   |   |   |   |
| PI              |    |   |    |   |    |   |    |   |    |   |    |   |    |   |    |   |   |   |   |   |   |   |   |   |
| BOP             |    |   | 0  | 0 | 0  | 0 | 0  | 0 | 0  | 0 | 0  | 0 | 0  | 0 | 0  | 0 | 0 | 0 | 0 | 0 | 0 | 0 | 0 | 0 |
| PD              |    |   | 1  | 1 | 1  | 1 | 1  | 1 | 1  | 1 | 2  | 2 | 1  | 2 | 2  | 1 | 2 | 2 | 1 | 2 | 2 | 1 | 2 | 2 |
| CEJ             |    |   | 1  | 1 | 1  | 1 | 0  | 1 | 1  | 0 | 1  | 1 | 1  | 1 | 0  | 1 | 1 | 0 | 1 | 1 | 0 | 1 | 1 |   |
| AL              |    |   | 0  | 0 | 0  | 0 | 1  | 0 | 0  | 1 | 0  | 1 | 1  | 1 | 1  | 1 | 1 | 1 | 1 | 1 | 1 | 1 | 1 |   |

GI >=1  
 Plaque >=1  
 BOP  
 PD >=4mm  
 PD >=6mm  
 iAL >=3mm  
 iAL >=5mm

| Extent | Percentile |
|--------|------------|
| 4      |            |
| 7      |            |
| 17     |            |
| 1      | 68         |
| 0      | 0          |
| 1      | 21         |
| 0      | 0          |

| TPC                       | N  |
|---------------------------|----|
| A Healthy                 | 26 |
| B Recession               | 1  |
| C Crown                   | 0  |
| D Gingival Inflammation   | 0  |
| E Interproximal Disease   | 1  |
| F Diminished Periodontium | 0  |
| G Severe                  | 0  |

Disease Status  
 PPC:  
 IPR Score:  
 IPR Percentile:  
 CDC/AAP  
 BGI

A-Healthy  
 5  
 10  
 Healthy  
 P2

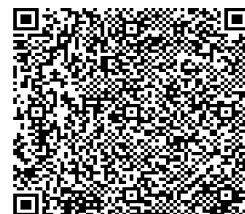

Supplement: NIHMS985880-supplement-Supplementary_Figure_2.pdf [file NIHMS985880-supplement-Supplementary_Figure_2.pdf]
