# Supplementary material
Source: PubMed Central journal article supplement (PMC6125155)

Patient Name x  
 Patient ID x  
 Date x  
 Visit x  
 Doctor x  
 Hygienist x

Age: 71  
 Gender: Female  
 Diabetic: Yes  
 Smoker: No

# PERIODONTAL PROFILE P3 System<sup>®</sup>

## PHENOTYPE

| Buccal Surface | 1 |   |   | 2    |   |   | 3    |   |   | 4 |   |   | 5    |   |   | 6    |   |   | 7    |   |   | 8    |   |   |
|----------------|---|---|---|------|---|---|------|---|---|---|---|---|------|---|---|------|---|---|------|---|---|------|---|---|
|                | d | f | m | d    | f | m | d    | f | m | d | f | m | d    | f | m | d    | f | m | d    | f | m | d    | f | m |
| GI             |   |   |   | 0    |   |   | 0    |   |   |   |   |   | 0    |   |   |      |   |   | 1    |   |   | 1    |   |   |
| PI             |   |   |   | 1    |   |   | 1    |   |   |   |   |   | 1    |   |   | 1    |   |   | 1    |   |   | 1    |   |   |
| BOP            |   |   |   | 0    | 0 | 0 | 0    | 0 | 0 |   |   |   | 0    | 0 | 0 | 0    | 0 | 0 | 1    | 1 | 1 | 0    | 0 | 0 |
| PD             |   |   |   | 3    | 2 | 2 | 2    | 2 | 3 |   |   |   | 4    | 1 | 1 | 4    | 1 | 2 | 2    | 1 | 2 | 2    | 1 | 2 |
| CEJ            |   |   |   | 1    | 1 | 1 | 1    | 1 | 1 |   |   |   | 1    | 1 | 1 | 1    | 1 | 1 | 1    | 1 | 1 | 1    | 1 | 1 |
| AL             |   |   |   | 2    | 1 | 1 | 1    | 1 | 2 |   |   |   | 3    | 0 | 0 | 3    | 0 | 1 | 1    | 0 | 1 | 1    | 0 | 1 |
| TPC            |   |   |   | E    |   |   | E    |   |   |   |   |   | E    |   |   | E    |   |   | D    |   |   | D    |   |   |
| TPC/Risk       |   |   |   | 21.9 |   |   | 21.9 |   |   |   |   |   | 21.9 |   |   | 21.9 |   |   | 22.3 |   |   | 22.3 |   |   |

| Buccal Surface | 9 |   |   | 10  |   |   | 11  |   |   | 12  |   |   | 13  |   |   | 14 |   |   | 15 |   |   | 16  |   |   |
|----------------|---|---|---|-----|---|---|-----|---|---|-----|---|---|-----|---|---|----|---|---|----|---|---|-----|---|---|
|                | m | f | d | m   | f | d | m   | f | d | m   | f | d | m   | f | d | m  | f | d | m  | f | d | m   | f | d |
| GI             |   |   |   | 0   |   |   | 0   |   |   | 0   |   |   | 0   |   |   |    |   |   |    |   |   | 0   |   |   |
| PI             |   |   |   | 1   |   |   | 1   |   |   | 1   |   |   | 1   |   |   |    |   |   |    |   |   | 1   |   |   |
| BOP            |   |   |   | 0   | 0 | 0 | 0   | 0 | 0 | 0   | 0 | 0 | 0   | 0 | 0 |    |   |   |    |   |   | 0   | 0 | 0 |
| PD             |   |   |   | 2   | 1 | 1 | 1   | 1 | 1 | 1   | 1 | 2 | 2   | 1 | 1 |    |   |   |    |   |   | 2   | 1 | 2 |
| CEJ            |   |   |   | 1   | 1 | 1 | 1   | 1 | 1 | 1   | 1 | 1 | 1   | 1 | 1 |    |   |   |    |   |   | 1   | 1 | 1 |
| AL             |   |   |   | 1   | 0 | 0 | 0   | 0 | 0 | 0   | 0 | 1 | 1   | 0 | 0 |    |   |   |    |   |   | 1   | 0 | 1 |
| TPC            |   |   |   | A   |   |   | A   |   |   | A   |   |   | A   |   |   |    |   |   |    |   |   | A   |   |   |
| TPC/Risk       |   |   |   | 8.9 |   |   | 8.9 |   |   | 8.9 |   |   | 8.9 |   |   |    |   |   |    |   |   | 8.9 |   |   |

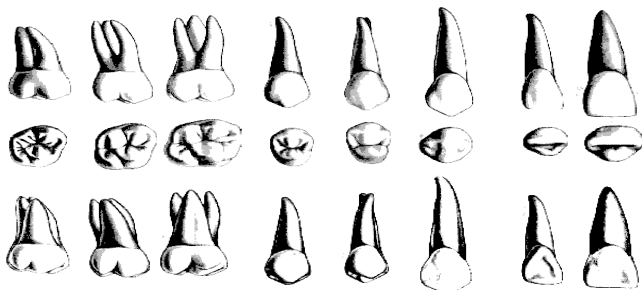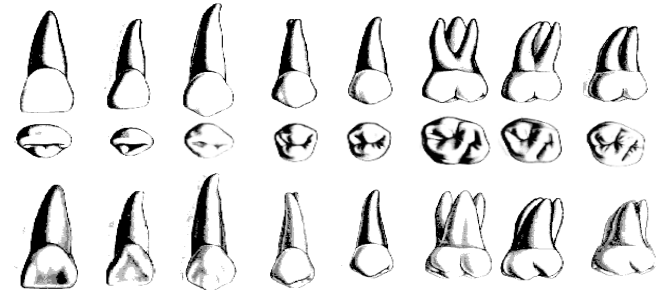

| Lingual Surface | 1 |   |   | 2 |   |   | 3 |   |   | 4 |   |   | 5 |   |   | 6 |   |   | 7 |   |   | 8 |   |   |
|-----------------|---|---|---|---|---|---|---|---|---|---|---|---|---|---|---|---|---|---|---|---|---|---|---|---|
|                 | d | l | m | d | l | m | d | l | m | d | l | m | d | l | m | d | l | m | d | l | m | d | l | m |
| GI              |   |   |   |   |   |   |   |   |   |   |   |   |   |   |   |   |   |   |   |   |   |   |   |   |
| PI              |   |   |   |   |   |   |   |   |   |   |   |   |   |   |   |   |   |   |   |   |   |   |   |   |
| BOP             |   |   |   | 0 | 0 | 0 | 0 | 0 | 0 |   |   |   | 0 | 0 | 0 | 0 | 0 | 1 | 0 | 0 | 0 | 0 | 0 | 1 |
| PD              |   |   |   | 3 | 2 | 4 | 4 | 2 | 2 |   |   |   | 2 | 1 | 2 | 2 | 1 | 1 | 1 | 1 | 1 | 1 | 1 | 1 |
| CEJ             |   |   |   | 1 | 1 | 1 | 1 | 1 | 1 |   |   |   | 1 | 1 | 1 | 1 | 1 | 1 | 1 | 1 | 1 | 1 | 1 | 1 |
| AL              |   |   |   | 2 | 1 | 3 | 3 | 1 | 1 |   |   |   | 1 | 0 | 1 | 1 | 0 | 0 | 0 | 0 | 0 | 0 | 0 | 0 |

| Lingual Surface | 9 |   |   | 10 |   |   | 11 |   |   | 12 |   |   | 13 |   |   | 14 |   |   | 15 |   |   | 16 |   |   |
|-----------------|---|---|---|----|---|---|----|---|---|----|---|---|----|---|---|----|---|---|----|---|---|----|---|---|
|                 | m | l | d | m  | l | d | m  | l | d | m  | l | d | m  | l | d | m  | l | d | m  | l | d | m  | l | d |
| GI              |   |   |   |    |   |   |    |   |   |    |   |   |    |   |   |    |   |   |    |   |   |    |   |   |
| PI              |   |   |   |    |   |   |    |   |   |    |   |   |    |   |   |    |   |   |    |   |   |    |   |   |
| BOP             |   |   |   | 0  | 0 | 0 | 0  | 0 | 0 | 0  | 0 | 0 | 1  | 0 | 0 |    |   |   |    |   |   | 0  | 0 | 1 |
| PD              |   |   |   | 2  | 1 | 1 | 1  | 1 | 2 | 1  | 1 | 1 | 2  | 1 | 2 |    |   |   |    |   |   | 2  | 2 | 2 |
| CEJ             |   |   |   | 1  | 1 | 1 | 1  | 1 | 1 | 1  | 1 | 1 | 1  | 1 | 1 |    |   |   |    |   |   | 1  | 1 | 1 |
| AL              |   |   |   | 1  | 0 | 0 | 0  | 0 | 1 | 0  | 0 | 1 | 0  | 1 |   |    |   |   |    |   |   | 1  | 1 | 1 |

| Buccal Surface | 32 |   |   | 31 |   |   | 30 |   |   | 29   |   |   | 28  |   |   | 27   |   |   | 26   |   |   | 25   |   |   |
|----------------|----|---|---|----|---|---|----|---|---|------|---|---|-----|---|---|------|---|---|------|---|---|------|---|---|
|                | d  | f | m | d  | f | m | d  | f | m | d    | f | m | d   | f | m | d    | f | m | d    | f | m | d    | f | m |
| GI             |    |   |   |    |   |   |    |   |   | 0    |   |   | 0   |   |   | 1    |   |   | 1    |   |   | 1    |   |   |
| PI             |    |   |   |    |   |   |    |   |   | 1    |   |   | 1   |   |   | 1    |   |   | 1    |   |   | 1    |   |   |
| BOP            |    |   |   |    |   |   |    |   |   | 1    | 1 | 1 | 1   | 1 | 1 | 1    | 1 | 1 | 0    | 0 | 0 | 0    | 0 | 0 |
| PD             |    |   |   |    |   |   |    |   |   | 1    | 1 | 2 | 2   | 1 | 2 | 1    | 1 | 1 | 1    | 1 | 1 | 1    | 1 | 1 |
| CEJ            |    |   |   |    |   |   |    |   |   | 1    | 1 | 1 | 1   | 1 | 1 | 1    | 1 | 1 | 1    | 1 | 1 | 1    | 1 | 1 |
| AL             |    |   |   |    |   |   |    |   |   | 0    | 0 | 1 | 1   | 0 | 1 | 0    | 0 | 0 | 0    | 0 | 0 | 0    | 0 | 0 |
| TPC            |    |   |   |    |   |   |    |   |   | D    |   |   | A   |   |   | D    |   |   | D    |   |   | D    |   |   |
| TPC/Risk       |    |   |   |    |   |   |    |   |   | 22.3 |   |   | 8.9 |   |   | 22.3 |   |   | 22.3 |   |   | 22.3 |   |   |

| Buccal Surface | 24 |   |   | 23 |   |   | 22 |   |   | 21 |   |   | 20 |   |   | 19 |   |   | 18 |   |   | 17   |   |   |
|----------------|----|---|---|----|---|---|----|---|---|----|---|---|----|---|---|----|---|---|----|---|---|------|---|---|
|                | m  | f | d | m  | f | d | m  | f | d | m  | f | d | m  | f | d | m  | f | d | m  | f | d | m    | f | d |
| GI             |    |   |   |    |   |   |    |   |   |    |   |   |    |   |   |    |   |   |    |   |   |      |   |   |
| PI             |    |   |   |    |   |   |    |   |   |    |   |   |    |   |   |    |   |   |    |   |   |      |   |   |
| BOP            |    |   |   |    |   |   |    |   |   |    |   |   |    |   |   |    |   |   |    |   |   | 0    | 0 | 0 |
| PD             |    |   |   |    |   |   |    |   |   |    |   |   |    |   |   |    |   |   |    |   |   | 2    | 2 | 2 |
| CEJ            |    |   |   |    |   |   |    |   |   |    |   |   |    |   |   |    |   |   |    |   |   | 1    | 1 | 1 |
| AL             |    |   |   |    |   |   |    |   |   |    |   |   |    |   |   |    |   |   |    |   |   | 1    | 1 | 1 |
| TPC            |    |   |   |    |   |   |    |   |   |    |   |   |    |   |   |    |   |   |    |   |   | B    |   |   |
| TPC/Risk       |    |   |   |    |   |   |    |   |   |    |   |   |    |   |   |    |   |   |    |   |   | 12.5 |   |   |

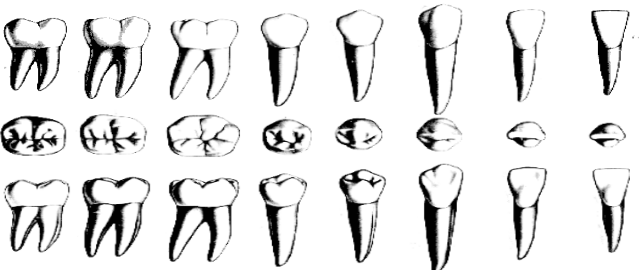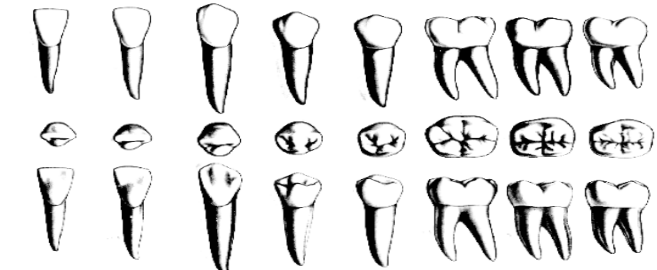

| Lingual Surface | 32 |   |   | 31 |   |   | 30 |   |   | 29 |   |   | 28 |   |   | 27 |   |   | 26 |   |   | 25 |   |   |
|-----------------|----|---|---|----|---|---|----|---|---|----|---|---|----|---|---|----|---|---|----|---|---|----|---|---|
|                 | d  | l | m | d  | l | m | d  | l | m | d  | l | m | d  | l | m | d  | l | m | d  | l | m | d  | l | m |
| GI              |    |   |   |    |   |   |    |   |   |    |   |   |    |   |   |    |   |   |    |   |   |    |   |   |
| PI              |    |   |   |    |   |   |    |   |   |    |   |   |    |   |   |    |   |   |    |   |   |    |   |   |
| BOP             |    |   |   |    |   |   |    |   |   | 1  | 1 | 1 | 1  | 1 | 1 | 0  | 0 | 0 | 0  | 0 | 0 | 0  | 0 | 0 |
| PD              |    |   |   |    |   |   |    |   |   | 2  | 2 | 3 | 3  | 1 | 2 | 2  | 1 | 3 | 1  | 1 | 1 | 1  | 1 | 1 |
| CEJ             |    |   |   |    |   |   |    |   |   | 1  | 1 | 1 | 1  | 1 | 1 | 1  | 1 | 1 | 1  | 1 | 1 | 1  | 1 | 1 |
| AL              |    |   |   |    |   |   |    |   |   | 1  | 1 | 2 | 2  | 0 | 1 | 1  | 0 | 2 | 0  | 0 | 0 | 0  | 0 | 0 |

| Lingual Surface | 24 |   |   | 23 |   |   | 22 |   |   | 21 |   |   | 20 |   |   | 19 |   |   | 18 |   |   | 17 |   |   |
|-----------------|----|---|---|----|---|---|----|---|---|----|---|---|----|---|---|----|---|---|----|---|---|----|---|---|
|                 | m  | l | d | m  | l | d | m  | l | d | m  | l | d | m  | l | d | m  | l | d | m  | l | d | m  | l | d |
| GI              |    |   |   |    |   |   |    |   |   |    |   |   |    |   |   |    |   |   |    |   |   |    |   |   |
| PI              |    |   |   |    |   |   |    |   |   |    |   |   |    |   |   |    |   |   |    |   |   |    |   |   |
| BOP             |    |   |   |    |   |   |    |   |   |    |   |   |    |   |   |    |   |   |    |   |   | 1  | 1 | 1 |
| PD              |    |   |   |    |   |   |    |   |   |    |   |   |    |   |   |    |   |   |    |   |   | 3  | 2 | 3 |
| CEJ             |    |   |   |    |   |   |    |   |   |    |   |   |    |   |   |    |   |   |    |   |   | 1  | 1 | 1 |
| AL              |    |   |   |    |   |   |    |   |   |    |   |   |    |   |   |    |   |   |    |   |   | 2  | 1 | 2 |

GI >=1  
 Plaque >=1  
 BOP  
 PD >=4mm  
 PD >=6mm  
 iAL >=3mm  
 iAL >=5mm

| Extent     | Percentile |
|------------|------------|
| GI >=1     | 43         |
| Plaque >=1 | 100        |
| BOP        | 26         |
| PD >=4mm   | 3 76       |
| PD >=6mm   | 0 0        |
| iAL >=3mm  | 5 38       |
| iAL >=5mm  | 0 0        |

| TPC                       | N  |
|---------------------------|----|
| A Healthy                 | 7  |
| B Recession               | 1  |
| C Crown                   | 0  |
| D Gingival Inflammation   | 10 |
| E Interproximal Disease   | 4  |
| F Diminished Periodontium | 0  |
| G Severe                  | 0  |

Disease Status  
 PPC:  
 IPR Score:  
 IPR Percentile:  
 CDC/AAP  
 BGI

| C-High GI |
|-----------|
| 28        |
| 80        |
| Mild      |
| P2        |

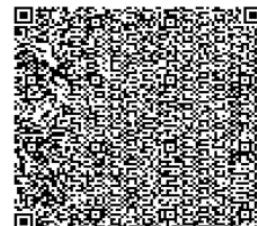

Supplement: NIHMS985880-supplement-Supplementary_Figure_2B.pdf [file NIHMS985880-supplement-Supplementary_Figure_2B.pdf]
