# Supplementary material
Source: PubMed Central journal article supplement (PMC6125155)

Patient Name x  
 Patient ID x  
 Date x  
 Visit x  
 Doctor x  
 Hygienist x

Age: 58  
 Gender: Male  
 Diabetic: Yes  
 Smoker: No

# PERIODONTAL PROFILE P3 System<sup>®</sup>

## PHENOTYPE

| Buccal Surface | 1 |   | 2 |   | 3 |   | 4    |    | 5    |   | 6    |    | 7    |    | 8 |  |
|----------------|---|---|---|---|---|---|------|----|------|---|------|----|------|----|---|--|
|                | d | f | m | d | f | m | d    | f  | m    | d | f    | m  | d    | f  | m |  |
| GI             |   |   |   |   |   |   | 1    |    | 1    |   | 1    |    | 1    |    |   |  |
| PI             |   |   |   |   |   |   | 0    |    | 0    |   | 1    |    | 1    |    |   |  |
| BOP            |   |   |   |   |   |   | 1    | 1  | 1    | 1 | 0    | 1  | 1    | 1  | 1 |  |
| PD             |   |   |   |   |   |   | 2    | 3  | 5    | 4 | 1    | 5  | 4    | 2  | 3 |  |
| CEJ            |   |   |   |   |   |   | -3   | -2 | 0    | 0 | -2   | -1 | 0    | -5 | 1 |  |
| AL             |   |   |   |   |   |   | 5    | 5  | 5    | 4 | 3    | 6  | 4    | 7  | 2 |  |
| TPC            |   |   |   |   |   |   | G    |    | G    |   | E    |    | G    |    |   |  |
| TPC/Risk       |   |   |   |   |   |   | 45.8 |    | 45.8 |   | 27.4 |    | 45.8 |    |   |  |

| Buccal Surface | 9    |    | 10   |   | 11   |   | 12   |    | 13 |   | 14 |    | 15 |   | 16 |  |
|----------------|------|----|------|---|------|---|------|----|----|---|----|----|----|---|----|--|
|                | m    | f  | d    | m | f    | d | m    | f  | d  | m | f  | d  | m  | f | d  |  |
| GI             |      |    |      |   |      |   | 1    |    | 1  |   | 1  |    | 1  |   |    |  |
| PI             |      |    |      |   |      |   | 1    |    | 1  |   | 1  |    | 1  |   |    |  |
| BOP            | 1    | 1  | 1    | 1 | 1    | 1 | 1    | 1  | 1  | 1 | 1  | 1  | 1  | 1 | 1  |  |
| PD             | 4    | 1  | 5    | 5 | 1    | 5 | 4    | 3  | 6  | 7 | 2  | 3  |    |   |    |  |
| CEJ            | -3   | -3 | 0    | 0 | 1    | 1 | 0    | -2 | 1  | 1 | -3 | -4 |    |   |    |  |
| AL             | 7    | 4  | 5    | 5 | 0    | 4 | 4    | 5  | 5  | 6 | 5  | 7  |    |   |    |  |
| TPC            | G    |    | G    |   | G    |   | G    |    | G  |   |    |    |    |   |    |  |
| TPC/Risk       | 45.8 |    | 45.8 |   | 45.8 |   | 45.8 |    |    |   |    |    |    |   |    |  |

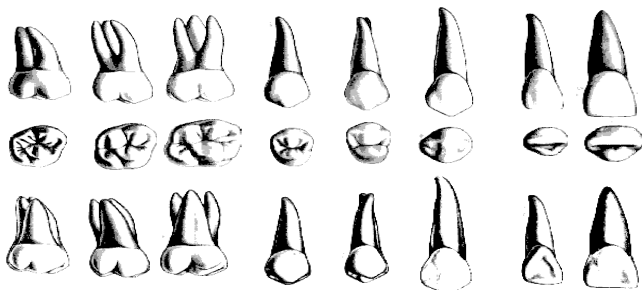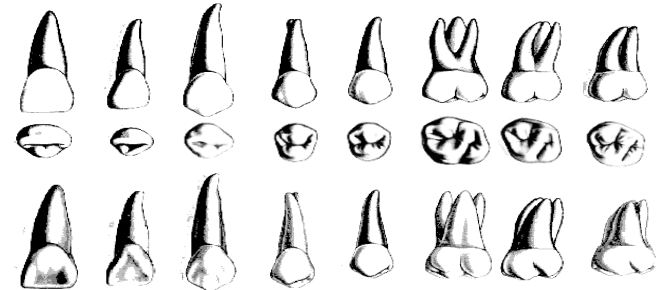

| Lingual Surface | 1 |   | 2 |   | 3 |   | 4  |    | 5 |    | 6  |   | 7 |   | 8 |  |
|-----------------|---|---|---|---|---|---|----|----|---|----|----|---|---|---|---|--|
|                 | d | l | m | d | l | m | d  | l  | m | d  | l  | m | d | l | m |  |
| GI              |   |   |   |   |   |   |    |    |   |    |    |   |   |   |   |  |
| PI              |   |   |   |   |   |   |    |    |   |    |    |   |   |   |   |  |
| BOP             |   |   |   |   |   |   | 1  | 1  | 1 | 1  | 1  | 1 | 1 | 1 | 1 |  |
| PD              |   |   |   |   |   |   | 3  | 2  | 5 | 4  | 1  | 5 | 4 | 2 | 3 |  |
| CEJ             |   |   |   |   |   |   | -3 | -4 | 0 | -1 | -1 | 1 | 1 | 1 | 0 |  |
| AL              |   |   |   |   |   |   | 6  | 6  | 5 | 5  | 2  | 4 | 3 | 1 | 2 |  |

| Lingual Surface | 9  |    | 10 |   | 11 |    | 12 |   | 13 |    | 14 |    | 15 |   | 16 |  |
|-----------------|----|----|----|---|----|----|----|---|----|----|----|----|----|---|----|--|
|                 | m  | l  | d  | m | l  | d  | m  | l | d  | m  | l  | d  | m  | l | d  |  |
| GI              |    |    |    |   |    |    |    |   |    |    |    |    |    |   |    |  |
| PI              |    |    |    |   |    |    |    |   |    |    |    |    |    |   |    |  |
| BOP             | 1  | 1  | 1  | 1 | 1  | 1  | 1  | 1 | 1  | 1  | 1  | 1  | 1  | 1 | 1  |  |
| PD              | 5  | 2  | 3  | 3 | 2  | 3  | 3  | 1 | 2  | 2  | 1  | 3  |    |   |    |  |
| CEJ             | -4 | -4 | -3 | 0 | 0  | -1 | -1 | 0 | -1 | -1 | -2 | -4 |    |   |    |  |
| AL              | 9  | 6  | 6  | 3 | 2  | 4  | 4  | 1 | 3  | 3  | 3  | 7  |    |   |    |  |

| Buccal Surface | 32 |   | 31 |      | 30 |      | 29 |      | 28 |      | 27 |      | 26 |      | 25 |  |
|----------------|----|---|----|------|----|------|----|------|----|------|----|------|----|------|----|--|
|                | d  | f | m  | d    | f  | m    | d  | f    | m  | d    | f  | m    | d  | f    | m  |  |
| GI             |    |   |    | 1    |    | 1    |    | 1    |    | 1    |    | 1    |    | 1    |    |  |
| PI             |    |   |    | 1    |    | 1    |    | 1    |    | 1    |    | 1    |    | 1    |    |  |
| BOP            |    |   |    | 1    | 1  | 1    | 1  | 1    | 1  | 1    | 1  | 1    | 1  | 1    | 1  |  |
| PD             |    |   |    | 5    | 1  | 5    | 5  | 1    | 4  | 3    | 1  | 3    | 3  | 1    | 2  |  |
| CEJ            |    |   |    | 0    | -1 | 0    | 1  | 0    | 0  | 1    | -1 | 1    | -1 | 1    | 0  |  |
| AL             |    |   |    | 5    | 2  | 5    | 4  | 1    | 4  | 2    | 2  | 2    | 1  | 1    | 2  |  |
| TPC            |    |   |    | G    |    | G    |    | G    |    | G    |    | E    |    | F    |    |  |
| TPC/Risk       |    |   |    | 45.8 |    | 45.8 |    | 45.8 |    | 45.8 |    | 27.4 |    | 34.1 |    |  |

| Buccal Surface | 24   |   | 23 |   | 22   |   | 21   |   | 20   |   | 19 |   | 18 |    | 17 |  |
|----------------|------|---|----|---|------|---|------|---|------|---|----|---|----|----|----|--|
|                | m    | f | d  | m | f    | d | m    | f | d    | m | f  | d | m  | f  | d  |  |
| GI             |      |   |    | 1 |      | 1 |      | 1 |      | 1 |    | 1 |    | 1  |    |  |
| PI             |      |   |    | 1 |      | 1 |      | 1 |      | 1 |    | 1 |    | 1  |    |  |
| BOP            | 1    | 1 | 1  | 1 | 1    | 1 | 1    | 0 | 1    | 1 | 0  | 1 | 1  | 1  | 1  |  |
| PD             | 3    | 2 | 2  | 3 | 2    | 3 | 3    | 1 | 3    | 5 | 1  | 5 | 5  | 1  | 1  |  |
| CEJ            | -1   | 0 | 1  | 1 | 1    | 1 | 1    | 1 | 0    | 1 | 1  | 1 | -2 | -3 |    |  |
| AL             | 4    | 2 | 1  | 2 | 1    | 2 | 2    | 0 | 2    | 5 | 0  | 4 | 3  | 4  |    |  |
| TPC            | F    |   | D  |   | F    |   | G    |   | F    |   |    |   |    |    |    |  |
| TPC/Risk       | 34.1 |   | 25 |   | 34.1 |   | 45.8 |   | 34.1 |   |    |   |    |    |    |  |

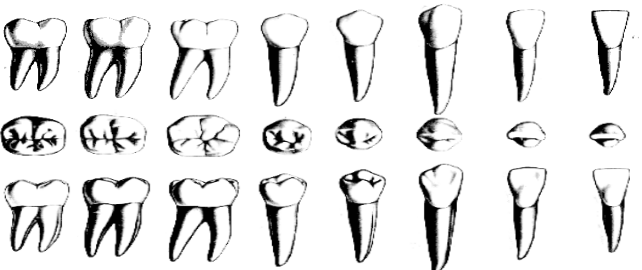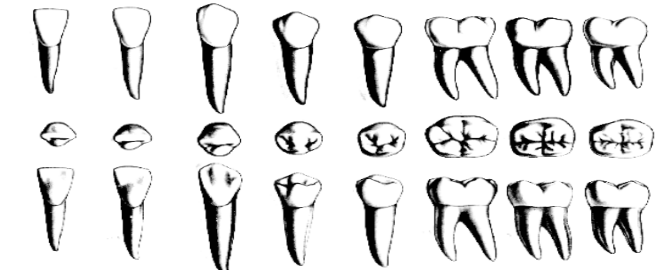

| Lingual Surface | 32 |   | 31 |   | 30 |   | 29 |    | 28 |   | 27 |   | 26 |   | 25 |  |
|-----------------|----|---|----|---|----|---|----|----|----|---|----|---|----|---|----|--|
|                 | d  | l | m  | d | l  | m | d  | l  | m  | d | l  | m | d  | l | m  |  |
| GI              |    |   |    |   |    |   |    |    |    |   |    |   |    |   |    |  |
| PI              |    |   |    |   |    |   |    |    |    |   |    |   |    |   |    |  |
| BOP             |    |   |    | 1 | 1  | 1 | 1  | 1  | 1  | 1 | 1  | 1 | 1  | 1 | 1  |  |
| PD              |    |   |    | 5 | 5  | 4 | 6  | 4  | 6  | 5 | 3  | 6 | 4  | 2 | 6  |  |
| CEJ             |    |   |    | 1 | 1  | 1 | 1  | -1 | 1  | 1 | 1  | 1 | 1  | 0 | 0  |  |
| AL              |    |   |    | 4 | 4  | 3 | 5  | 5  | 5  | 4 | 2  | 5 | 3  | 1 | 5  |  |

| Lingual Surface | 24 |    | 23 |    | 22 |    | 21 |    | 20 |   | 19 |   | 18 |    | 17 |  |
|-----------------|----|----|----|----|----|----|----|----|----|---|----|---|----|----|----|--|
|                 | m  | l  | d  | m  | l  | d  | m  | l  | d  | m | l  | d | m  | l  | d  |  |
| GI              |    |    |    |    |    |    |    |    |    |   |    |   |    |    |    |  |
| PI              |    |    |    |    |    |    |    |    |    |   |    |   |    |    |    |  |
| BOP             | 1  | 1  | 1  | 1  | 1  | 1  | 1  | 1  | 1  | 1 | 1  | 1 | 1  | 1  | 1  |  |
| PD              | 3  | 2  | 2  | 2  | 1  | 2  | 1  | 1  | 2  | 4 | 2  | 4 | 3  | 2  | 3  |  |
| CEJ             | -2 | -2 | -2 | -1 | -1 | -2 | -2 | -3 | -3 | 0 | 0  | 0 | -1 | -3 | -4 |  |
| AL              | 5  | 4  | 4  | 3  | 2  | 4  | 3  | 4  | 5  | 4 | 2  | 4 | 4  | 5  | 7  |  |

GI >=1  
 Plaque >=1  
 BOP  
 PD >=4mm  
 PD >=6mm  
 iAL >=3mm  
 iAL >=5mm

| Extent     | Percentile |
|------------|------------|
| GI >=1     | 100        |
| Plaque >=1 | 91         |
| BOP        | 98         |
| PD >=4mm   | 35 97      |
| PD >=6mm   | 8 98       |
| iAL >=3mm  | 84 93      |
| iAL >=5mm  | 45 95      |

| TPC                       | N  |
|---------------------------|----|
| A Healthy                 | 0  |
| B Recession               | 0  |
| C Crown                   | 0  |
| D Gingival Inflammation   | 1  |
| E Interproximal Disease   | 2  |
| F Diminished Periodontium | 5  |
| G Severe                  | 14 |

Disease Status  
 PPC:  
 IPR Score:  
 IPR Percentile:  
 CDC/AAP  
 BGI

G-Severe Disease  
 46  
 100  
 Severe  
 P3

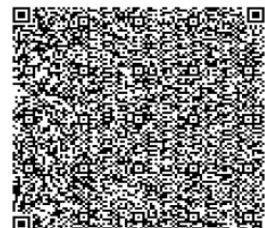

Supplement: NIHMS985880-supplement-Supplementary_Figure_2C.pdf [file NIHMS985880-supplement-Supplementary_Figure_2C.pdf]
