# Supplementary material
Source: PubMed Central journal article supplement (PMC6125155)
Supplement: NIHMS985880-supplement-Supplementary_Figure_1.pdf [file NIHMS985880-supplement-Supplementary_Figure_1.pdf]

**Maxilla and Mandible Tooth Numbers**

| TPC | Descriptor              | Arch     | 1/32 | 2/31 | 3/30 | 4/29 | 5/28 | 6/27 | 7/26 | 8/25 | 9/24 | 10/23 | 11/22 | 12/21 | 13/20 | 14/19 | 15/18 | 16/17 |
|-----|-------------------------|----------|------|------|------|------|------|------|------|------|------|-------|-------|-------|-------|-------|-------|-------|
| A   | Health                  | Maxilla  | 23.5 | 20.0 | 14.3 | 27.1 | 34.0 | 53.4 | 62.8 | 61.3 | 60.3 | 61.3  | 51.0  | 34.0  | 29.4  | 14.3  | 22.0  | 25.5  |
|     |                         | Mandible | 19.3 | 14.6 | 11.1 | 26.1 | 40.0 | 52.4 | 51.5 | 48.0 | 49.1 | 53.4  | 52.9  | 40.9  | 27.4  | 10.7  | 13.7  | 19.6  |
| B   | Recession               | Maxilla  | 2.3  | 5.6  | 9.3  | 6.8  | 11.6 | 10.1 | 3.0  | 3.4  | 4.0  | 4.1   | 12.8  | 11.8  | 6.7   | 11.4  | 7.1   | 3.0   |
|     |                         | Mandible | 1.7  | 5.7  | 7.5  | 8.5  | 13.1 | 8.2  | 11.1 | 14.9 | 14.3 | 11.5  | 10.0  | 13.6  | 8.1   | 7.7   | 5.0   | 1.8   |
| C   | Crown                   | Maxilla  | 3.6  | 11.2 | 15.8 | 23.6 | 20.2 | 8.7  | 12.3 | 14.2 | 14.6 | 13.6  | 9.7   | 22.1  | 26.2  | 17.2  | 13.1  | 4.5   |
|     |                         | Mandible | 6.3  | 17.0 | 21.5 | 17.4 | 8.8  | 3.3  | 1.8  | 1.8  | 1.8  | 1.6   | 3.3   | 9.5   | 18.4  | 24.0  | 19.1  | 7.1   |
| D   | Gingival Inflammation   | Maxilla  | 15.6 | 9.5  | 8.1  | 9.3  | 10.0 | 13.2 | 12.6 | 11.2 | 10.9 | 11.6  | 11.9  | 9.0   | 10.0  | 8.2   | 10.9  | 17.3  |
|     |                         | Mandible | 14.8 | 9.5  | 6.5  | 12.5 | 15.0 | 19.8 | 19.4 | 17.5 | 17.1 | 17.7  | 17.9  | 14.2  | 11.9  | 7.2   | 10.4  | 15.9  |
| E   | Interproximal Disease   | Maxilla  | 30.6 | 31.1 | 28.9 | 20.2 | 15.1 | 7.0  | 4.2  | 4.5  | 4.5  | 4.3   | 6.5   | 14.4  | 16.5  | 24.9  | 25.9  | 24.9  |
|     |                         | Mandible | 38.6 | 35.6 | 36.5 | 19.5 | 11.5 | 5.0  | 3.4  | 1.5  | 1.9  | 2.6   | 3.9   | 9.6   | 16.4  | 33.4  | 33.6  | 33.0  |
| F   | Diminished Periodontium | Maxilla  | 5.1  | 8.3  | 11.2 | 7.3  | 4.4  | 4.0  | 2.4  | 2.5  | 2.9  | 2.6   | 4.3   | 4.6   | 6.5   | 11.5  | 7.6   | 5.6   |
|     |                         | Mandible | 3.0  | 4.8  | 5.9  | 10.9 | 7.7  | 7.3  | 9.0  | 13.1 | 13.0 | 9.6   | 8.0   | 8.0   | 12.4  | 6.0   | 5.0   | 3.5   |
| G   | Severe                  | Maxilla  | 19.2 | 14.3 | 12.4 | 5.9  | 4.7  | 3.5  | 2.7  | 2.8  | 2.7  | 2.5   | 3.7   | 4.1   | 4.8   | 12.5  | 13.4  | 19.2  |
|     |                         | Mandible | 16.3 | 12.8 | 11.1 | 5.1  | 4.0  | 4.0  | 3.9  | 3.1  | 2.9  | 3.6   | 4.0   | 4.1   | 5.4   | 11.1  | 13.2  | 19.1  |
